1 **Title** Women’s knowledge, attitudes and views of preconception health and intervention delivery methods:  
2 A cross-sectional survey

3

4 **Authors:**

5 Michael P Daly\* - Bristol Medical School, University of Bristol, Bristol, UK

6 James White - School of Medicine, Cardiff University, UK

7 Julia Sanders - School of Healthcare Sciences, Cardiff University, UK

8 Ruth R Kipping - Bristol Medical School, University of Bristol, Bristol, UK

9 \*Corresponding author: [michael.daly@bristol.ac.uk](mailto:michael.daly@bristol.ac.uk)

10

## 11 Abstract

12 Background: Several preconception exposures have been associated with adverse pregnancy, birth and  
13 postpartum outcomes. However, few studies have investigated women’s knowledge of and attitudes  
14 towards preconception health, and the acceptability of potential intervention methods.

15 Methods: Seven GP practices in the West of England posted questionnaires to 4,330 female patients aged 18  
16 to 48 years. Without providing examples, we asked women to name maternal preconception risk factors,  
17 and assessed their knowledge of nine literature-derived risk factors. Attitudes towards preconception health  
18 (interest, intentions, self-efficacy and perceived awareness and importance) and the acceptability of  
19 intervention delivery methods were also assessed. Multivariable multilevel regression examined participant  
20 characteristics associated with these outcomes.

21 Results: Of those who received questionnaires, 835 (19.3%) responded. Women were most aware of the  
22 preconception risk factors of diet (86.0%) and physical activity (79.2%). Few were aware of weight (40.1%),  
23 folic acid (32.9%), abuse (6.3%); advanced age (5.9%) and interpregnancy intervals (0.2%), and none  
24 mentioned interpregnancy weight change or excess iron intake. After adjusting for demographic and  
25 reproductive covariates, women aged 18-25-years (compared to 40-48-year-olds) and nulligravid women  
26 were less aware of the benefit of preconception folic acid supplementation (adjusted odds ratios (aOR) for  
27 age: 4.30 [2.10, 8.80], gravidity: aOR 2.48 [1.70, 3.62]). Younger women were more interested in learning  
28 more about preconception health (aOR 0.37 [0.21, 0.63]) but nulligravid women were less interested in this  
29 (aOR 1.79 [1.30, 2.46]). Women with the lowest household incomes (versus the highest) were less aware of  
30 preconception weight as a risk factor (aOR: 3.11 [1.65, 5.84]) and rated the importance of preconception  
31 health lower (aOR 3.38 [1.90, 6.00]). The most acceptable information delivery channels were websites/apps  
32 (99.5%), printed healthcare materials (98.6%), family/partners (96.3%), schools (94.4%), television (91.9%),  
33 pregnancy tests (91.0%) and doctors, midwives and nurses (86.8-97.0%). Dentists (23.9%) and  
34 hairdressers/beauticians (18.1%) were the least acceptable.

35 Conclusions: Our findings demonstrate a need to promote awareness of preconception risk factors and  
36 motivation for preconception health changes, particularly amongst younger and nulligravid women and  
37 women with lower incomes. Interventions to improve preconception health should focus on communication  
38 from healthcare professionals, schools, family members, and digital media.

39

**NOTE: This preprint reports new research that has not been certified by peer review and should not be used to guide clinical practice.**

## 40 Keywords

41 Preconception Care; Health Knowledge, Attitudes, Practice; Surveys and Questionnaires; Cross-Sectional  
42 Studies; Intervention development

43

## 44 Background

45 Adverse pregnancy, birth and postpartum outcomes have a substantial impact on morbidity and mortality.  
46 Worldwide, there are around 23 million miscarriages (1), 14.8 million live preterm births (2), 2.4 million  
47 neonatal deaths (3) and 295,000 maternal deaths due to pregnancy or childbirth complications each year (4).  
48 A recent umbrella review found high- and moderate-certainty evidence that maternal preconception folate  
49 supplementation, maternal body mass index (BMI), interpregnancy weight change and physical inactivity  
50 affect the risk of outcomes such as neural tube defects, pre-eclampsia and gestational diabetes (5). The  
51 guidelines and policies of national health organisations also highlight the importance of these factors in the  
52 preconception period (6-8). However, evidence suggests that less than half of women begin folate  
53 supplementation before pregnancy in countries such as England, Scotland and the United States (9, 10), one  
54 in two women of reproductive age are overweight or obese (10, 11) and, globally, 31.7% are not sufficiently  
55 active (12). Moreover, a number of these preconception risk factors have been associated with maternal  
56 characteristics such as age, ethnicity, educational attainment, socioeconomic status, reproductive history  
57 and pregnancy intentions (10, 13-16).

58 Improving women's knowledge of and attitudes towards preconception health is considered crucial to  
59 improving child and maternal health (17). There are, however, limitations in the existing literature on these  
60 factors. A recent systematic review of studies that measured women's knowledge of preconception health  
61 (18) found 18 of the 34 included studies were of low methodological quality, with almost half recruiting only  
62 student participants and most omitting preconception risk factors such as maternal weight and physical  
63 activity. Studies also prompted participants by listing risk factors, which may lead to an overestimation of  
64 knowledge. The one study that used open-ended, free-text questions (19) to assess this knowledge only  
65 recruited university students (N = 299) and asked about lifestyle changes. These differences in sampling and  
66 question design have resulted in heterogenous knowledge estimates, with estimates ranging from 31% to  
67 100% reported for women's knowledge of recommendations to supplement with folic acid before pregnancy  
68 (15).

69 The last and only study to have assessed British women's knowledge of and attitudes towards preconception  
70 health was published by Wallace and Hurwitz in 1998 (20). The authors found Asian ethnicity, foreign birth,  
71 and nulligravidity were associated with a lack of knowledge of preconception folate supplementation,  
72 recommended alcohol consumption limits, and rubella infection indications. The delivery of preconception  
73 care in primary was found to be acceptable to participants, but no other methods of intervention delivery  
74 were explored. The study also only recruited only patients who attended nine general practices in an  
75 affluent London borough, which may have resulted in an overestimation of knowledge. Moreover, only  
76 univariate statistical techniques were used, meaning covariates were not adjusted for and the reported  
77 findings may have been spurious.

78 Accordingly, our objectives were to assess: women's knowledge of preconception health exposures  
79 associated with risk of adverse pregnancy, birth and postpartum outcomes, their attitudes towards  
80 preconception health, and the acceptability of different delivery methods for preconception health  
81 interventions. We also explored whether these varied by demographic characteristics, reproductive history,  
82 and pregnancy intentions.

83

## 84 Methods

85 The study received ethical approval from the South West – Frenchay Research Ethics Committee before its  
86 conduct. It is reported following STROBE guidelines (21).

### 87 Study design

88 A cross-sectional survey design was used, informed by theories of behaviour (22). We assessed: women’s  
89 knowledge of preconception health risk factors and their self-efficacy in making positive preconception  
90 changes; their attitudes towards the importance of preconception health and learning more about it; and  
91 the acceptability of different methods of delivering interventions to improve preconception health.

### 92 Setting

93 Seven general practices in the West of England were purposively sampled to maximise variation in the  
94 socioeconomic backgrounds of participants, through considering indices of deprivation for each prospective  
95 practice’s locality (23) and oversampling practices from relatively deprived areas. Practices sent eligible  
96 patients the questionnaire by post, between August 2020 and March 2021. Prepaid envelopes, an  
97 information sheet and study team contact details were also enclosed. The first page of the questionnaire  
98 informed recipients that to take part in the study, they had to read and tick each of four consent statements.  
99 Recipients were given the option of completing the questionnaire anonymously to reduce the risk of socially  
100 desirable responding (24). Reminder postcards were sent to all recipients one month after the  
101 questionnaire. Participants were given a £5 shopping voucher to thank them for taking part.

### 102 Participants

103 Lists of women meeting the study’s inclusion criteria (Box 1) were compiled by practice administrators using  
104 standardised electronic patient database searches. General practitioners (GPs) then worked consecutively  
105 through these lists, consulting patient notes where further information was required, to remove patients  
106 according to the study’s exclusion criteria until the required numbers of eligible patients were identified. The  
107 eligibility criteria were informed by the literature and input from GPs based at non-participating practices.  
108 The upper age threshold of 48 years was chosen to facilitate comparison with the findings of Wallace and  
109 Hurwitz’s (20) survey, and the lower threshold of 18 years was selected as the GPs consulted felt it would be  
110 unacceptable to send the questionnaire to non-adult participants. Eligible patients were required to have  
111 English as their main spoken language as many of the questionnaire’s items have not been validated for use  
112 in non-English speaking populations, and because funding was not available for the use of translators. The  
113 remaining criteria were developed to exclude patients who were likely to be distressed by a questionnaire  
114 relating to pregnancy and/or have difficulties providing informed consent.

115

#### 116 Box 1: Study eligibility criteria

|                           |                                                                                                                                                                                                                                                                                                                                                                                                                                                                                                                                                                                                                                    |
|---------------------------|------------------------------------------------------------------------------------------------------------------------------------------------------------------------------------------------------------------------------------------------------------------------------------------------------------------------------------------------------------------------------------------------------------------------------------------------------------------------------------------------------------------------------------------------------------------------------------------------------------------------------------|
| <b>Inclusion criteria</b> | <ol style="list-style-type: none"><li>1. Registered as a patient with a participating general practice</li><li>2. Female</li><li>3. Aged 18 to 48 years</li><li>4. Main spoken language coded as English</li></ol>                                                                                                                                                                                                                                                                                                                                                                                                                 |
| <b>Exclusion criteria</b> | <ol style="list-style-type: none"><li>1. Current pregnancy known to the general practice</li><li>2. Having a condition causing permanent infertility (e.g. hysterectomy, tubal ligation, menopause)</li><li>3. Having an enduring condition involving profound cognitive impairment (e.g. severe developmental language disorder or disorder of intellectual development) likely to introduce major difficulties in understanding the questionnaire and/or its purpose</li><li>4. Likely to be distressed by pregnancy-related content (e.g. pregnancy loss at any stage in the last 3 months, perinatal mortality ever)</li></ol> |

117 **Variables and measurement**

118 Full information on the question stems, response options, sources, psychometric properties, and  
119 modifications made to the questionnaire's featured items can be found in Additional file 1. The participant  
120 characteristic exposure variables were: age, ethnicity, and country of birth (25), educational attainment (26),  
121 and household income (27). Additionally, items relating to gravidity, previous live birth(s), adverse pregnancy  
122 outcomes, fertility issues, and pregnancy intentions were adapted from the third British national survey of  
123 sexual attitudes and lifestyles (Natsal-3) questionnaire (28). Exposure variables were also used in the  
124 multivariable analyses as covariates.

125 The outcome measures were assessed using relevant questionnaire items from survey studies featured in  
126 three literature reviews (13, 15, 18). The open-ended, free-text item used by Stern et al. (19) was used to  
127 assess knowledge of maternal preconception risk factors. However, while the original item asked  
128 participants to list only 'changes in lifestyle', our adapted version asked women to list maternal pre-  
129 pregnancy factors that could be done, started, continued, stopped or avoided, or that 'relate to a woman's  
130 life, circumstances or health', which might affect pregnancy outcomes. The number of participants who  
131 listed each of nine preconception risk factors (Box 2), for which high-, moderate- or low-certainty evidence  
132 of an association with an adverse pregnancy, birth or postpartum outcome(s) was found in a recent umbrella  
133 review (5), was summed. All other preconception exposures named as risk factors by participants were also  
134 tallied.

135 Informed by the COM-B model (22), questions on women's attitudes included: perceived awareness (29) and  
136 importance (30) of preconception health, interest in knowing more about preconception health (31), and  
137 preconceptional self-efficacy (32) and lifestyle change intentions (19). No existing items relating to the use  
138 and acceptability of potential intervention delivery channels were identified, so we asked participants to rate  
139 how comfortable they would be discussing preconception health and their pregnancy plans with various  
140 people, when they last had contact with each of these people, and how acceptable it would be for  
141 information about preconception health to be made available in different places and settings, using five- and  
142 seven-point Likert scales. These intervention delivery methods were derived from the literature and  
143 discussions within the study team (see Additional file 2).

144

145

146

147

148

149

150

151

152

153 Box 2: Preconception risk factors, with accepted participant responses

| Preconception risk factor                                        | Evidence certainty* | Accepted responses                                                                                                                                                                                                                                                                                                 |
|------------------------------------------------------------------|---------------------|--------------------------------------------------------------------------------------------------------------------------------------------------------------------------------------------------------------------------------------------------------------------------------------------------------------------|
| Folic acid supplementation                                       | High                | Explicitly mentions folic acid/folate or a multivitamin containing folic acid as something to do/start/continue before pregnancy                                                                                                                                                                                   |
| Physical activity                                                | Moderate            | Mentions physical activity, exercise or a specific form of exercise (e.g. swimming, yoga) as something to do/start/continue before pregnancy, or inactivity or sedentarism as something to avoid.                                                                                                                  |
| Body mass index (BMI) /weight                                    |                     | Mentions BMI, 'healthy' weight, underweight, overweight or obesity, loss of 'excess' weight, or avoiding over- or undereating                                                                                                                                                                                      |
| Interpregnancy weight change                                     |                     | Mentions change in weight (loss or gain) from a previous pregnancy                                                                                                                                                                                                                                                 |
| Excess iron intake                                               | Low                 | Mentions excess iron as something to avoid                                                                                                                                                                                                                                                                         |
| Diet (Mediterranean/ high Alternate Healthy Eating Index [AHEI]) |                     | Explicitly mentions either of these diets, one or more of their key components (e.g. fruit, vegetable, legume, seed/nut, bean, cereal, grain, fish or unsaturated fat intake as positives or high meat, saturated fat, sodium or added sugar intake as negatives), or the importance of a 'good' or 'healthy' diet |
| Abuse†                                                           |                     | Mentions domestic abuse, violence, or 'unsafe', 'hostile' or 'toxic' relationships                                                                                                                                                                                                                                 |
| Age                                                              |                     | Mentions maternal age                                                                                                                                                                                                                                                                                              |
| Interpregnancy intervals                                         |                     | Mentions 'time since last child', 'family planning', or 'spacing of children'                                                                                                                                                                                                                                      |

154 Legend: \*Determined using the GRADE approach in Daly et al. (5) †Physical, emotional or sexual

155 To examine content validity, the full questionnaire was presented to an external 'expert panel' as  
 156 recommended by de Vet et al. (33), involving academics, a pregnancy charity representative and a public  
 157 health lead, all of whom had expertise in preconception health specifically or child and maternal health  
 158 generally. To establish face validity, twenty-one female members of the public aged 18-48 years were  
 159 consulted to ensure the questionnaire's phrasing and formatting were comprehensible and acceptable to  
 160 the target population. Recurring departures from the intended interpretation were noted and commonly  
 161 misunderstood terms and phrasings were either re-worded or explicitly defined.

162 Study size and statistical methods

163 The target sample size was estimated as 770. This was calculated with the prevalence of the outcome  
 164 variables as 50% in both the 18-29 and 30-48-years age groups, as recommended for instances where  
 165 prevalence is unknown (34), and by inputting a precision of 5%, giving a 95% confidence interval of 45-55%.  
 166 Having a similar number of 18-29 and 30-48-year-olds was of interest as 29 years has been the national  
 167 average maternal age at first birth for the past seven years (35). Questionnaires were sent in two mailouts,  
 168 with response rates from the first mailout informing the number of questionnaires required in the  
 169 subsequent mail-out to reach the target sample sizes in both age groups.

170 Prevalence values with 95% confidence intervals were calculated for all outcome variables. Univariable  
 171 multilevel regression (individuals nested within GP practices) was performed for each exposure.  
 172 Multivariable multilevel regression models were then performed to explore whether these exposure  
 173 variables were associated with the outcomes following adjustment for covariates. Covariates were informed  
 174 by the literature (9, 11, 14, 15, 19, 20) and chosen *a priori*. Covariates that were very weakly correlated with  
 175 the exposure ( $r < 0.05$ ) or showed a weak association with the outcome ( $p > 0.05$ ) in the univariable analyses  
 176 were not included. This was to avoid unnecessary adjustment, which can adversely affect estimate precision  
 177 in logistic models (36). The covariates adjusted for in each analysis are presented in Additional file 3.  
 178 Analyses excluded participants missing data for any of the included variables.

## 179 Results

### 180 Participant characteristics

181 Figure 1 shows the flow of study participants. 725 women were excluded, with the most common reasons  
182 being: likely to be distressed by pregnancy-related content (65.5%), current pregnancy known to the practice  
183 (17.9%), and enduring and profound cognitive impairment (11.7%). 4,330 questionnaires were sent and 835  
184 (19.3%) were returned.

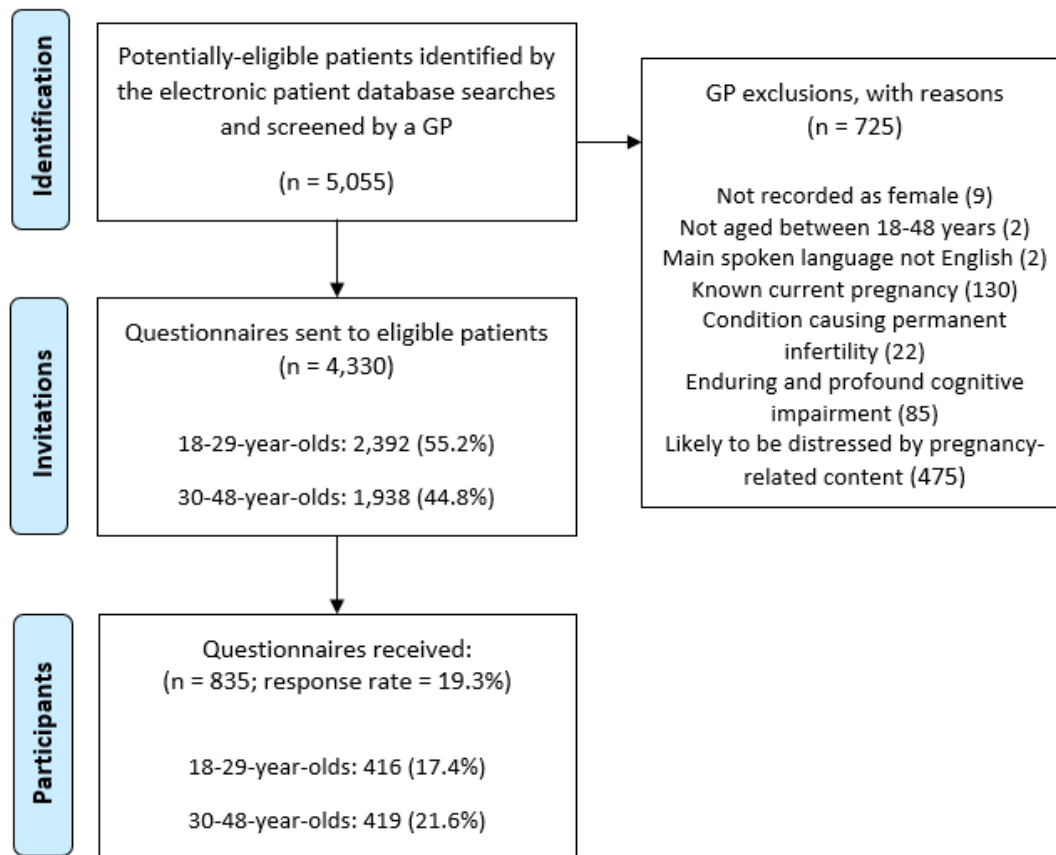

185

186 Figure 1: Study enrolment flowchart

187

### 188 Descriptive data

189 Table 1 shows there was an even split of 18-29 and 30-48-year-old participants. A third (32.1%) of the study  
190 population had household incomes below £32,000, compared with 43% of the UK population (37). A greater  
191 proportion of the study sample were UK-born (91.9 vs 84.3%), identified as White (92.6 vs 84.8%), and were  
192 university graduates (68.6 vs 42%) than the national population. Approximately half (48.4%) of participants  
193 had previously been pregnant, and a third (38.8%) of participants reported at least one live birth. All five  
194 participants who reported a stillbirth also reported a live birth(s).

195

196

197

198

199 **Table 1: Characteristics of the study population, with comparison to the national population**

| Variable                            | Response categories                   | Study sample |      | National population |                                                                              |
|-------------------------------------|---------------------------------------|--------------|------|---------------------|------------------------------------------------------------------------------|
|                                     |                                       | N            | (%)  | (%)                 | Data source (year; country)                                                  |
| <b>Age (years)</b>                  | 18-19                                 | 26           | 3.1  | -*                  | Office for National Statistics (2020; England) ( <a href="#">38</a> )        |
|                                     | 20-24                                 | 120          | 14.4 | 15.8                |                                                                              |
|                                     | 25-29                                 | 275          | 32.9 | 17.2                |                                                                              |
|                                     | 30-34                                 | 131          | 15.7 | 17.4                |                                                                              |
|                                     | 35-39                                 | 139          | 16.6 | 17.1                |                                                                              |
|                                     | 40-44                                 | 95           | 11.4 | 15.9                |                                                                              |
|                                     | 45-48                                 | 49           | 5.9  | 16.6†               |                                                                              |
|                                     | <i>Missing</i>                        | 0            | 0.0  |                     |                                                                              |
| <b>Household income (£)</b>         | Less than 13,000                      | 53           | 6.5  | 6                   | Office for National Statistics (2020; United Kingdom) ( <a href="#">37</a> ) |
|                                     | 13,000-18,999                         | 53           | 6.5  | 10                  |                                                                              |
|                                     | 19,000-25,999                         | 85           | 10.4 | 15                  |                                                                              |
|                                     | 26,000-31,999                         | 71           | 8.7  | 12                  |                                                                              |
|                                     | 32,000-47,999                         | 142          | 17.4 | 24                  |                                                                              |
|                                     | 48,000-63,999                         | 158          | 19.4 | 15                  |                                                                              |
|                                     | 64,000-95,999                         | 161          | 19.7 | 12                  |                                                                              |
|                                     | More than 96,000                      | 93           | 11.4 | 7                   |                                                                              |
| <i>Missing</i>                      | 19                                    | 2.3          |      |                     |                                                                              |
| <b>Ethnicity</b>                    | White                                 | 767          | 92.6 | 84.3                | Office for National Statistics (2019; England) ( <a href="#">39</a> )        |
|                                     | Mixed/Multiple ethnic groups          | 27           | 3.3  | 1.9                 |                                                                              |
|                                     | Asian/Asian British                   | 19           | 2.3  | 8.3                 |                                                                              |
|                                     | Black/African/Caribbean/Black British | 13           | 1.6  | 3.7                 |                                                                              |
|                                     | Other ethnic group                    | 2            | 0.2  | 1.9                 |                                                                              |
|                                     | <i>Missing</i>                        | 7            | 0.8  |                     |                                                                              |
| <b>Education</b>                    | University                            | 569          | 68.6 | 41.9                | Office for National Statistics (2017; United Kingdom) ( <a href="#">40</a> ) |
|                                     | Intermediate                          | 185          | 22.3 | 9.4                 |                                                                              |
|                                     | Secondary school                      | 64           | 7.7  | 40.7                |                                                                              |
|                                     | Primary school or less                | 2            | 0.2  | 8.0                 |                                                                              |
|                                     | Still in education                    | 9            | 1.1  | -‡                  |                                                                              |
|                                     | <i>Missing</i>                        | 6            | 0.7  |                     |                                                                              |
| <b>Country of birth</b>             | The UK                                | 759          | 91.9 | 84.3                | Office for National Statistics (2019; England) ( <a href="#">41</a> )        |
|                                     | Other                                 | 67           | 8.1  | 15.7                |                                                                              |
|                                     | <i>Missing</i>                        | 9            | 1.1  |                     |                                                                              |
| <b>Ever pregnant</b>                | Previously pregnant                   | 404          | 48.4 | -                   | <i>Not available</i>                                                         |
|                                     | Never pregnant                        | 430          | 51.6 | -                   |                                                                              |
|                                     | <i>Missing</i>                        | 1            | 0.1  |                     |                                                                              |
| <b>Previous live birth(s)</b>       | Yes                                   | 324          | 38.8 | -                   | <i>Not available</i>                                                         |
|                                     | No                                    | 510          | 61.1 | -                   |                                                                              |
|                                     | <i>Missing</i>                        | 1            | 0.1  |                     |                                                                              |
| <b>Adverse pregnancy outcome(s)</b> | Yes §                                 | 140          | 16.8 | -                   | <i>Not available</i>                                                         |
|                                     | No                                    | 694          | 83.2 | -                   |                                                                              |
|                                     | <i>Missing</i>                        | 1            | 0.1  |                     |                                                                              |

|                             |                                                                  |     |      |      |                                                                          |
|-----------------------------|------------------------------------------------------------------|-----|------|------|--------------------------------------------------------------------------|
| <b>Previous infertility</b> | Yes                                                              | 88  | 10.6 | 12.5 | Datta et al. (2010-2012; Britain) – 8,869 women aged 16 to 74 years (42) |
|                             | No                                                               | 745 | 89.4 | 87.5 |                                                                          |
|                             | Missing                                                          | 2   | 0.2  |      |                                                                          |
| <b>Pregnancy intentions</b> | Currently trying to become pregnant                              | 50  | 6.1  | -    | <i>Not available</i>                                                     |
|                             | Would like to get pregnant in the next 1-2 years                 | 144 | 17.5 | -    |                                                                          |
|                             | Would like to get pregnant in the next 3+ years                  | 183 | 22.3 | -    |                                                                          |
|                             | Not sure/Don't know                                              | 209 | 25.5 | -    |                                                                          |
|                             | Would definitely not like (more) children/Unable to get pregnant | 235 | 28.6 | -    |                                                                          |
|                             | Missing                                                          | 14  | 1.7  |      |                                                                          |

201 Legend: \*Data available for 15-19-year-olds only; The remaining percentage figures are therefore relative to the  
 202 number of 20-49-year-olds in England. †Comparison population is 45-49-year-olds. ‡Comparison population is men and  
 203 women aged 20 to 65 years not enrolled on any educational course. §Participants who reported a miscarriage (n = 137),  
 204 a termination due to a foetal anomaly (10), and/or a stillbirth (5). ||Participants who were unable to become pregnant  
 205 after ≥12 months of trying and/or who had ever sought medical or professional help for infertility

206

## 207 Knowledge

208 Table 2 shows maternal diet and physical activity were the only two risk factors listed by the majority of  
 209 participants (86.0% and 79.2%, respectively). Less than half of women listed maternal weight/BMI, folic acid,  
 210 abuse, age, and interpregnancy intervals. No participants mentioned interpregnancy weight change or  
 211 avoiding excess iron intake. The preconception exposures most commonly listed for which there was *no*  
 212 high, moderate or low certainty evidence of an association(s) with an adverse pregnancy, birth or  
 213 postpartum outcome(s) in Daly et al. (5) were: alcohol consumption (89.7%), smoking (89.3%), stress  
 214 (51.6%), substance abuse (48.3%), vitamins (without explicit mention of folic acid; 34.9%), mental  
 215 health/self-care (33.1%) and social support and relationships (25.3%). The full list is presented in Additional  
 216 file 4.

217

218 **Table 2: Participant knowledge levels of preconception risk factors**

| Evidence certainty* | Preconception risk factor    | N   | % (95% confidence interval) |
|---------------------|------------------------------|-----|-----------------------------|
| High                | Folic acid                   | 275 | 32.9 (29.8, 36.2)           |
| Moderate            | Physical activity            | 661 | 79.2 (76.3, 81.8)           |
|                     | Body mass index (BMI)/weight | 335 | 40.1 (36.8, 43.5)           |
|                     | Interpregnancy weight change | 0   | 0.0 (0.0, 0.0)              |
| Low                 | Excess iron intake           | 0   | 0.0 (0.0, 0.0)              |
|                     | Diet                         | 718 | 86.0 (83.4, 88.2)           |
|                     | Abuse                        | 53  | 6.3 (4.9, 8.2)              |
|                     | Age                          | 49  | 5.9 (4.5, 7.7)              |
|                     | Interpregnancy intervals     | 2   | 0.2 (0.1, 1.0)              |

219 Legend: \*Determined using the GRADE approach in Daly et al. (5) †Physical, emotional or sexual

220

221



222 Table 3 shows the adjusted associations between participant characteristics and knowledge of  
223 preconception risk factors. Interpregnancy weight change, excess iron intake and interpregnancy intervals  
224 were excluded from these analyses as zero and two participants listed these factors, respectively. The  
225 proportions of participants who listed each risk factor, by participant characteristic, are presented in  
226 Additional file 5. After adjustment, older age, university education, pregnancy desire, gravidity, prior  
227 livebirth(s) and adverse pregnancy outcome(s) were associated with knowledge of the benefit of  
228 preconception folic acid supplementation. The likelihood of listing BMI as a risk factor rose with increasing  
229 household income.

**Table 3: Adjusted odds ratios for associations between participant characteristics and knowledge of preconception risk factors**

|                                | Folic acid          | Physical activity | Body mass index     | Diet                | Abuse*              | Age                 |
|--------------------------------|---------------------|-------------------|---------------------|---------------------|---------------------|---------------------|
| <b>Age</b>                     |                     |                   |                     |                     |                     |                     |
| 18-24 years                    | (reference)         | (reference)       | (reference)         | (reference)         | (reference)         | (reference)         |
| 25-29 years                    | 1.59 (0.87, 2.88)   | 0.85 (0.51, 1.41) | 1.56 (0.98, 2.48)   | 0.72 (0.38, 1.37)   | 0.45 (0.18, 1.12)   | 1.29 (0.51, 3.24)   |
| 30-34 years                    | 3.42 (1.79, 6.52) ‡ | 1.89 (0.94, 3.78) | 1.84 (1.06, 3.18) § | 0.93 (0.42, 2.06)   | 0.89 (0.33, 2.40)   | 1.05 (0.33, 3.38)   |
| 35-39 years                    | 4.77 (2.41, 9.43) ‡ | 1.28 (0.64, 2.58) | 1.44 (0.80, 2.60)   | 0.67 (0.29, 1.52)   | 0.84 (0.29, 2.45)   | 1.68 (0.52, 5.42)   |
| 40-48 years                    | 4.30 (2.10, 8.80) ‡ | 1.27 (0.61, 2.62) | 1.77 (0.95, 3.29)   | 0.61 (0.26, 1.45)   | 0.41 (0.12, 1.35)   | 1.30 (0.36, 4.67)   |
| <b>Income</b>                  |                     |                   |                     |                     |                     |                     |
| <£19,000                       | (reference)         | (reference)       | (reference)         | (reference)         | (reference)         | (reference)         |
| £19,000-£25,999                | 0.83 (0.40, 1.71)   | 1.00 (0.51, 1.96) | 0.92 (0.48, 1.79)   | 1.35 (0.58, 3.13)   | 1.13 (0.36, 3.60)   | 1.07 (0.32, 3.57)   |
| £26,000-£31,999                | 0.82 (0.38, 1.76)   | 1.67 (0.78, 3.54) | 1.27 (0.66, 2.47)   | 2.68 (0.93, 7.70)   | 1.09 (0.33, 3.61)   | 0.40 (0.08, 2.10)   |
| £32,000-£47,999                | 1.01 (0.55, 1.87)   | 1.50 (0.81, 2.76) | 1.38 (0.79, 2.42)   | 1.25 (0.61, 2.56)   | 0.66 (0.22, 1.95)   | 0.66 (0.20, 2.14)   |
| £48,000-£63,999                | 1.35 (0.73, 2.49)   | 1.47 (0.79, 2.74) | 1.80 (1.03, 3.15) § | 1.25 (0.60, 2.60)   | 0.91 (0.32, 2.61)   | 0.92 (0.30, 2.80)   |
| £64,000-£95,999                | 1.25 (0.67, 2.31)   | 1.64 (0.86, 3.10) | 1.93 (1.10, 3.39) § | 1.26 (0.60, 2.62)   | 0.75 (0.25, 2.24)   | 1.11 (0.37, 3.32)   |
| ≥£96,000                       | 1.20 (0.61, 2.38)   | 1.39 (0.67, 2.87) | 3.11 (1.65, 5.84) ‡ | 1.15 (0.50, 2.64)   | 0.48 (0.12, 1.89)   | 1.36 (0.41, 4.54)   |
| <b>Education</b>               |                     |                   |                     |                     |                     |                     |
| School                         | (reference)         | (reference)       | (reference)         | (reference)         | (reference)         | (reference)         |
| Intermediate                   | 1.58 (0.78, 3.22)   | 0.61 (0.30, 1.22) | 1.16 (0.62, 2.16)   | 0.84 (0.35, 1.99)   | 0.59 (0.21, 1.69)   | 0.70 (0.20, 2.44)   |
| University                     | 2.37 (1.21, 4.64) § | 1.18 (0.59, 2.35) | 0.92 (0.51, 1.65)   | 1.06 (0.46, 2.44)   | 0.63 (0.23, 1.72)   | 0.74 (0.22, 2.42)   |
| <b>Minority ethnicity†</b>     | 0.89 (0.50, 1.58)   | 0.74 (0.40, 1.36) | 0.82 (0.48, 1.40)   | 1.04 (0.48, 2.26)   | 0.47 (0.11, 2.01)   | 0.50 (0.12, 2.11)   |
| <b>Born outside the UK†</b>    | 0.52 (0.29, 0.94) § | 1.72 (0.80, 3.70) | 0.62 (0.36, 1.08)   | 1.57 (0.66, 3.78)   | 0.44 (0.10, 1.88)   | 2.12 (0.89, 5.05)   |
| <b>Ever pregnant†</b>          | 2.48 (1.70, 3.62) ‡ | 1.19 (0.76, 1.84) | 1.10 (0.77, 1.56)   | 1.20 (0.73, 1.97)   | 1.99 (0.96, 4.14)   | 0.46 (0.22, 0.99) § |
| <b>Previous live birth(s)†</b> | 2.18 (1.47, 3.22) ‡ | 0.98 (0.61, 1.57) | 1.27 (0.87, 1.85)   | 1.20 (0.70, 2.03)   | 2.15 (1.00, 4.62)   | 0.38 (0.17, 0.86) § |
| <b>Adverse outcomes†</b>       | 2.49 (1.63, 3.81) ‡ | 0.79 (0.49, 1.27) | 0.99 (0.66, 1.49)   | 0.89 (0.51, 1.56)   | 1.20 (0.56, 2.55)   | 0.53 (0.20, 1.44)   |
| <b>Previous infertility†</b>   | 1.38 (0.88, 2.14)   | 0.84 (0.51, 1.40) | 1.28 (0.85, 1.95)   | 1.02 (0.56, 1.87)   | 0.95 (0.42, 2.13)   | 1.39 (0.61, 3.17)   |
| <b>Pregnancy intentions</b>    |                     |                   |                     |                     |                     |                     |
| Definitely not                 | (reference)         | (reference)       | (reference)         | (reference)         | (reference)         | (reference)         |
| Not sure/Don't know            | 1.13 (0.70, 1.84)   | 1.15 (0.66, 1.98) | 1.27 (0.80, 1.99)   | 2.27 (1.12, 4.63) § | 2.50 (1.11, 5.66) § | 0.84 (0.34, 2.10)   |
| In the next 3+ years           | 0.85 (0.45, 1.59)   | 1.11 (0.59, 2.10) | 1.28 (0.74, 2.20)   | 1.43 (0.66, 3.10)   | 1.06 (0.33, 3.36)   | 0.59 (0.19, 1.80)   |
| Within 2 years                 | 2.11 (1.30, 3.43) ‡ | 1.39 (0.79, 2.42) | 1.62 (1.03, 2.55) § | 0.97 (0.52, 1.79)   | 0.83 (0.31, 2.22)   | 0.86 (0.34, 2.13)   |

231 Legend: \*Physical, emotional, or sexual. †Reference categories were: White ethnicity (with all other response options categorised as minority ethnicity); Born in the UK;  
 232 Nulligravidity; Nulliparity; No prior miscarriage, stillbirth, or termination due to foetal abnormalities; No prior inability to become pregnant after ≥12 months of trying or  
 233 seeking of medical/professional help for infertility. ‡ Statistically significant at p<0.005. § Statistically significant at p<0.05.

234 Attitudes

235 Over a third of participants felt they were slightly or not aware at all of preconception health risk factors,  
236 and almost half of participants were either slightly or not at all interested in knowing more about  
237 preconception health (Additional file 6). Few participants disagreed that maternal preconception health can  
238 affect maternal and infant health outcomes or that they could make positive preconception changes, or  
239 reported that they would be unlikely to make these changes. Table 4 shows that after adjustment, women  
240 over 30 years, gravid and parous women, and women who reported adverse pregnancy outcomes felt more  
241 aware of preconception risk factors. Higher-income and minority ethnic women rated higher the importance  
242 of preconception health. Women under 40 years, minority ethnic, gravid and parous women, and women  
243 wishing to become pregnant were more interested in preconception health education. Women aged 40 and  
244 over had greater belief they could make positive preconception changes.

Table 4: Associations between participant characteristics and attitudes towards preconception health

|                                | Perceived awareness of preconception risk factors | Perceived importance of preconception health | Interest in knowing more about preconception health | Preconceptional self-efficacy | Preconception lifestyle change intentions |
|--------------------------------|---------------------------------------------------|----------------------------------------------|-----------------------------------------------------|-------------------------------|-------------------------------------------|
| <b>Age</b>                     |                                                   |                                              |                                                     |                               |                                           |
| 18-24 years                    | (reference)                                       | (reference)                                  | (reference)                                         | (reference)                   | (reference)                               |
| 25-29 years                    | 0.95 (0.64, 1.40)                                 | 0.89 (0.59, 1.33)                            | 0.93 (0.64, 1.36)                                   | 0.98 (0.66, 1.47)             | 0.81 (0.55, 1.18)                         |
| 30-34 years                    | 2.16 (1.34, 3.47) †                               | 1.40 (0.86, 2.26)                            | 0.74 (0.46, 1.18)                                   | 1.62 (0.99, 2.65)             | 1.09 (0.69, 1.71)                         |
| 35-39 years                    | 2.66 (1.58, 4.49) †                               | 0.90 (0.56, 1.46)                            | 0.70 (0.42, 1.16)                                   | 1.37 (0.81, 2.32)             | 0.87 (0.56, 1.37)                         |
| 40-48 years                    | 2.68 (1.55, 4.62) †                               | 1.36 (0.85, 2.18)                            | 0.37 (0.21, 0.63) †                                 | 2.20 (1.30, 3.73) †           | 1.08 (0.70, 1.69)                         |
| <b>Household income</b>        |                                                   |                                              |                                                     |                               |                                           |
| <£19,000                       | (reference)                                       | (reference)                                  | (reference)                                         | (reference)                   | (reference)                               |
| £19,000-£25,999                | 0.55 (0.32, 0.94) ‡                               | 1.50 (0.85, 2.64)                            | 0.95 (0.55, 1.66)                                   | 0.80 (0.45, 1.43)             | 0.70 (0.40, 1.20)                         |
| £26,000-£31,999                | 1.20 (0.69, 2.08)                                 | 1.92 (1.06, 3.49) ‡                          | 1.28 (0.73, 2.23)                                   | 0.87 (0.48, 1.60)             | 0.86 (0.49, 1.53)                         |
| £32,000-£47,999                | 1.36 (0.85, 2.18)                                 | 2.21 (1.32, 3.69) †                          | 1.47 (0.91, 2.37)                                   | 0.96 (0.58, 1.59)             | 0.76 (0.47, 1.22)                         |
| £48,000-£63,999                | 1.15 (0.72, 1.81)                                 | 2.81 (1.70, 4.62) †                          | 1.29 (0.80, 2.09)                                   | 1.02 (0.61, 1.71)             | 0.90 (0.56, 1.44)                         |
| £64,000-£95,999                | 1.66 (1.04, 2.67) ‡                               | 2.46 (1.49, 4.08) †                          | 1.86 (1.14, 3.03) ‡                                 | 1.39 (0.83, 2.35)             | 1.04 (0.65, 1.65)                         |
| ≥£96,000                       | 1.54 (0.91, 2.61)                                 | 3.38 (1.90, 6.00) †                          | 1.46 (0.84, 2.54)                                   | 1.33 (0.73, 2.41)             | 0.92 (0.54, 1.57)                         |
| <b>Education</b>               |                                                   |                                              |                                                     |                               |                                           |
| School                         | (reference)                                       | (reference)                                  | (reference)                                         | (reference)                   | (reference)                               |
| Intermediate                   | 1.16 (0.67, 2.02)                                 | 1.23 (0.69, 2.20)                            | 1.08 (0.62, 1.90)                                   | 1.11 (0.62, 2.00)             | 0.83 (0.49, 1.42)                         |
| University                     | 1.19 (0.71, 2.00)                                 | 1.20 (0.70, 2.07)                            | 1.25 (0.74, 2.11)                                   | 1.32 (0.76, 2.30)             | 0.99 (0.61, 1.61)                         |
| <b>Minority ethnicity*</b>     | 0.80 (0.48, 1.32)                                 | 1.98 (1.18, 3.31) ‡                          | 2.28 (1.41, 3.69) †                                 | 1.24 (0.72, 2.14)             | 1.61 (0.92, 2.81)                         |
| <b>Born outside the UK*</b>    | 1.36 (0.84, 2.18)                                 | 1.26 (0.75, 2.10)                            | 1.37 (0.82, 2.28)                                   | 1.78 (1.06, 3.00) ‡           | 1.80 (1.06, 3.05) ‡                       |
| <b>Ever pregnant*</b>          | 3.08 (2.24, 4.23) †                               | 0.92 (0.67, 1.28)                            | 1.79 (1.30, 2.46) †                                 | 1.06 (0.76, 1.46)             | 1.04 (0.80, 1.35)                         |
| <b>Previous live birth(s)*</b> | 4.10 (2.89, 5.82) †                               | 0.81 (0.57, 1.15)                            | 1.84 (1.29, 2.62) †                                 | 0.95 (0.66, 1.36)             | 0.99 (0.76, 1.29)                         |
| <b>Adverse outcomes*</b>       | 1.91 (1.32, 2.77) †                               | 1.14 (0.78, 1.65)                            | 1.50 (1.04, 2.16) ‡                                 | 1.38 (0.94, 2.03)             | 1.34 (0.94, 1.90)                         |
| <b>Previous infertility*</b>   | 1.39 (0.94, 2.05)                                 | 0.76 (0.50, 1.13)                            | 1.02 (0.70, 1.49)                                   | 0.95 (0.64, 1.43)             | 1.40 (0.95, 2.07)                         |
| <b>Pregnancy intentions</b>    |                                                   |                                              |                                                     |                               |                                           |
| Definitely not                 | (reference)                                       | (reference)                                  | (reference)                                         | (reference)                   | (reference)                               |
| Not sure/Don't know            | 0.79 (0.53, 1.20)                                 | 1.14 (0.75, 1.73)                            | 2.98 (1.97, 4.49) †                                 | 0.88 (0.57, 1.36)             | 0.86 (0.60, 1.23)                         |
| In the next 3+ years           | 0.77 (0.48, 1.25)                                 | 1.12 (0.69, 1.83)                            | 6.06 (3.71, 9.90) †                                 | 0.89 (0.53, 1.49)             | 0.82 (0.57, 1.19)                         |
| Within 2 years                 | 1.28 (0.85, 1.93)                                 | 1.36 (0.89, 2.06)                            | 12.64 (8.13, 19.64) †                               | 1.05 (0.68, 1.62)             | 1.04 (0.72, 1.50)                         |

246

247

248

Legend: \*Reference categories were: White ethnicity (with all other response options categorised as minority ethnicity); Born in the UK; Nulligravidity; Nulliparity; No prior miscarriage, stillbirth, or termination due to foetal abnormalities; No prior inability to become pregnant after ≥12 months of trying or seeking of medical/professional help for infertility. †Statistically significant at p<0.005. ‡Statistically significant at p<0.05.

### Acceptability and use of intervention delivery channels

Figure 2 shows the most acceptable places and settings for preconception health information provision were: preconception health websites/apps (99.5% 'acceptable'), printed material in healthcare settings (98.6%), health education in schools (94.4%), television (91.9%), pregnancy tests (91.0%), and social media (88.2%). Figure 3(a) shows that, of the delivery channels involving people, family/partners (96.3%), doctors, midwives and nurses (86.8-97.0%), friends (86.5%), and sexual health/family planning staff (79.7%) were the most acceptable. Dentists (23.9%) and hairdressers/ beauticians (18.1%) were the least acceptable. Figure 3(b) shows that many participants reported 'never' having contact with: community/family support workers (87.0%), health visitors (57.4%), midwives (55.6%), sexual health/family planning staff (49.2%), and obstetricians/gynaecologists (48.5%). For all remaining options, at least 85% of participants reported contact in the last 3 years.

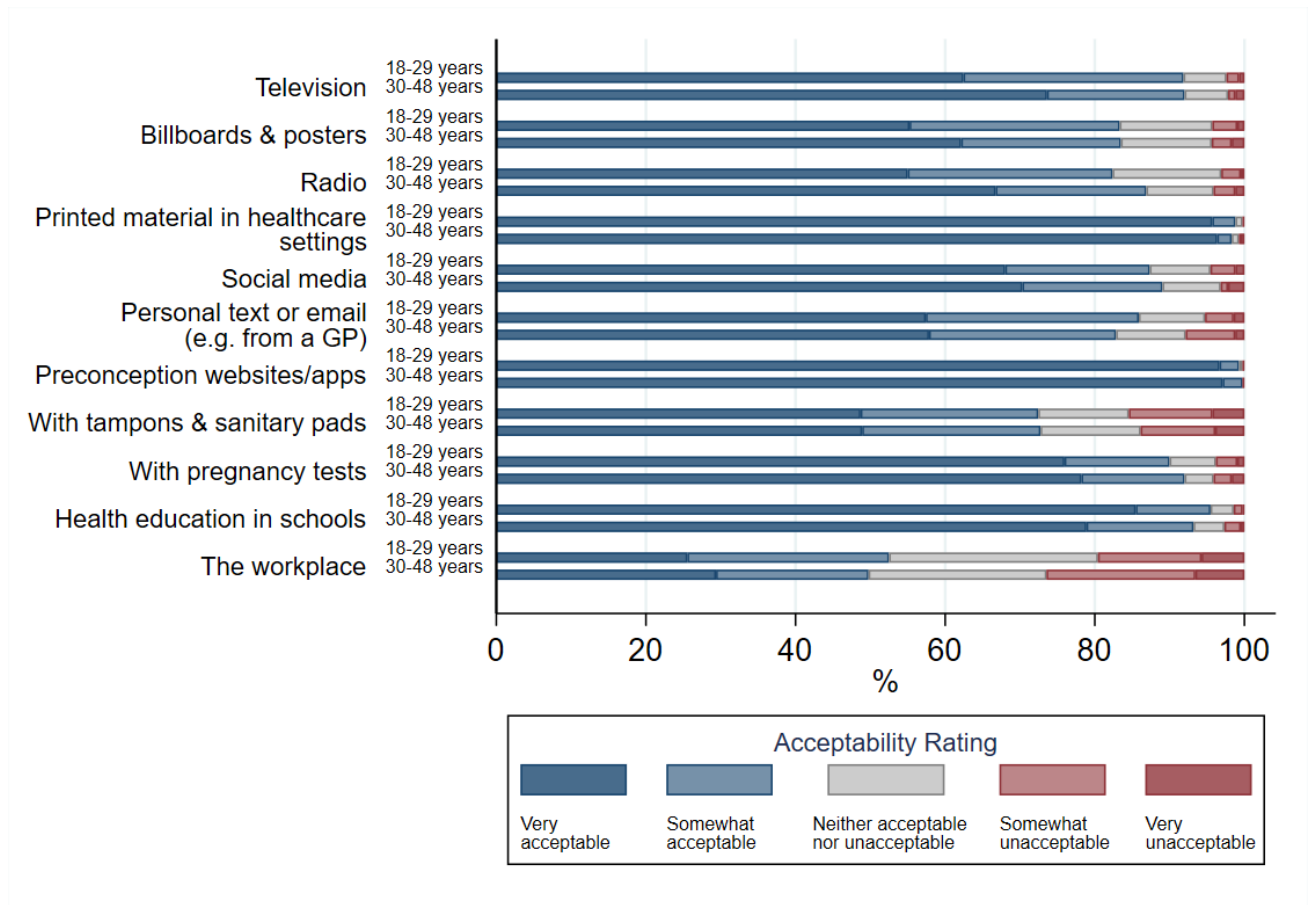

Figure 5: Acceptability of providing preconception health information in various places and settings

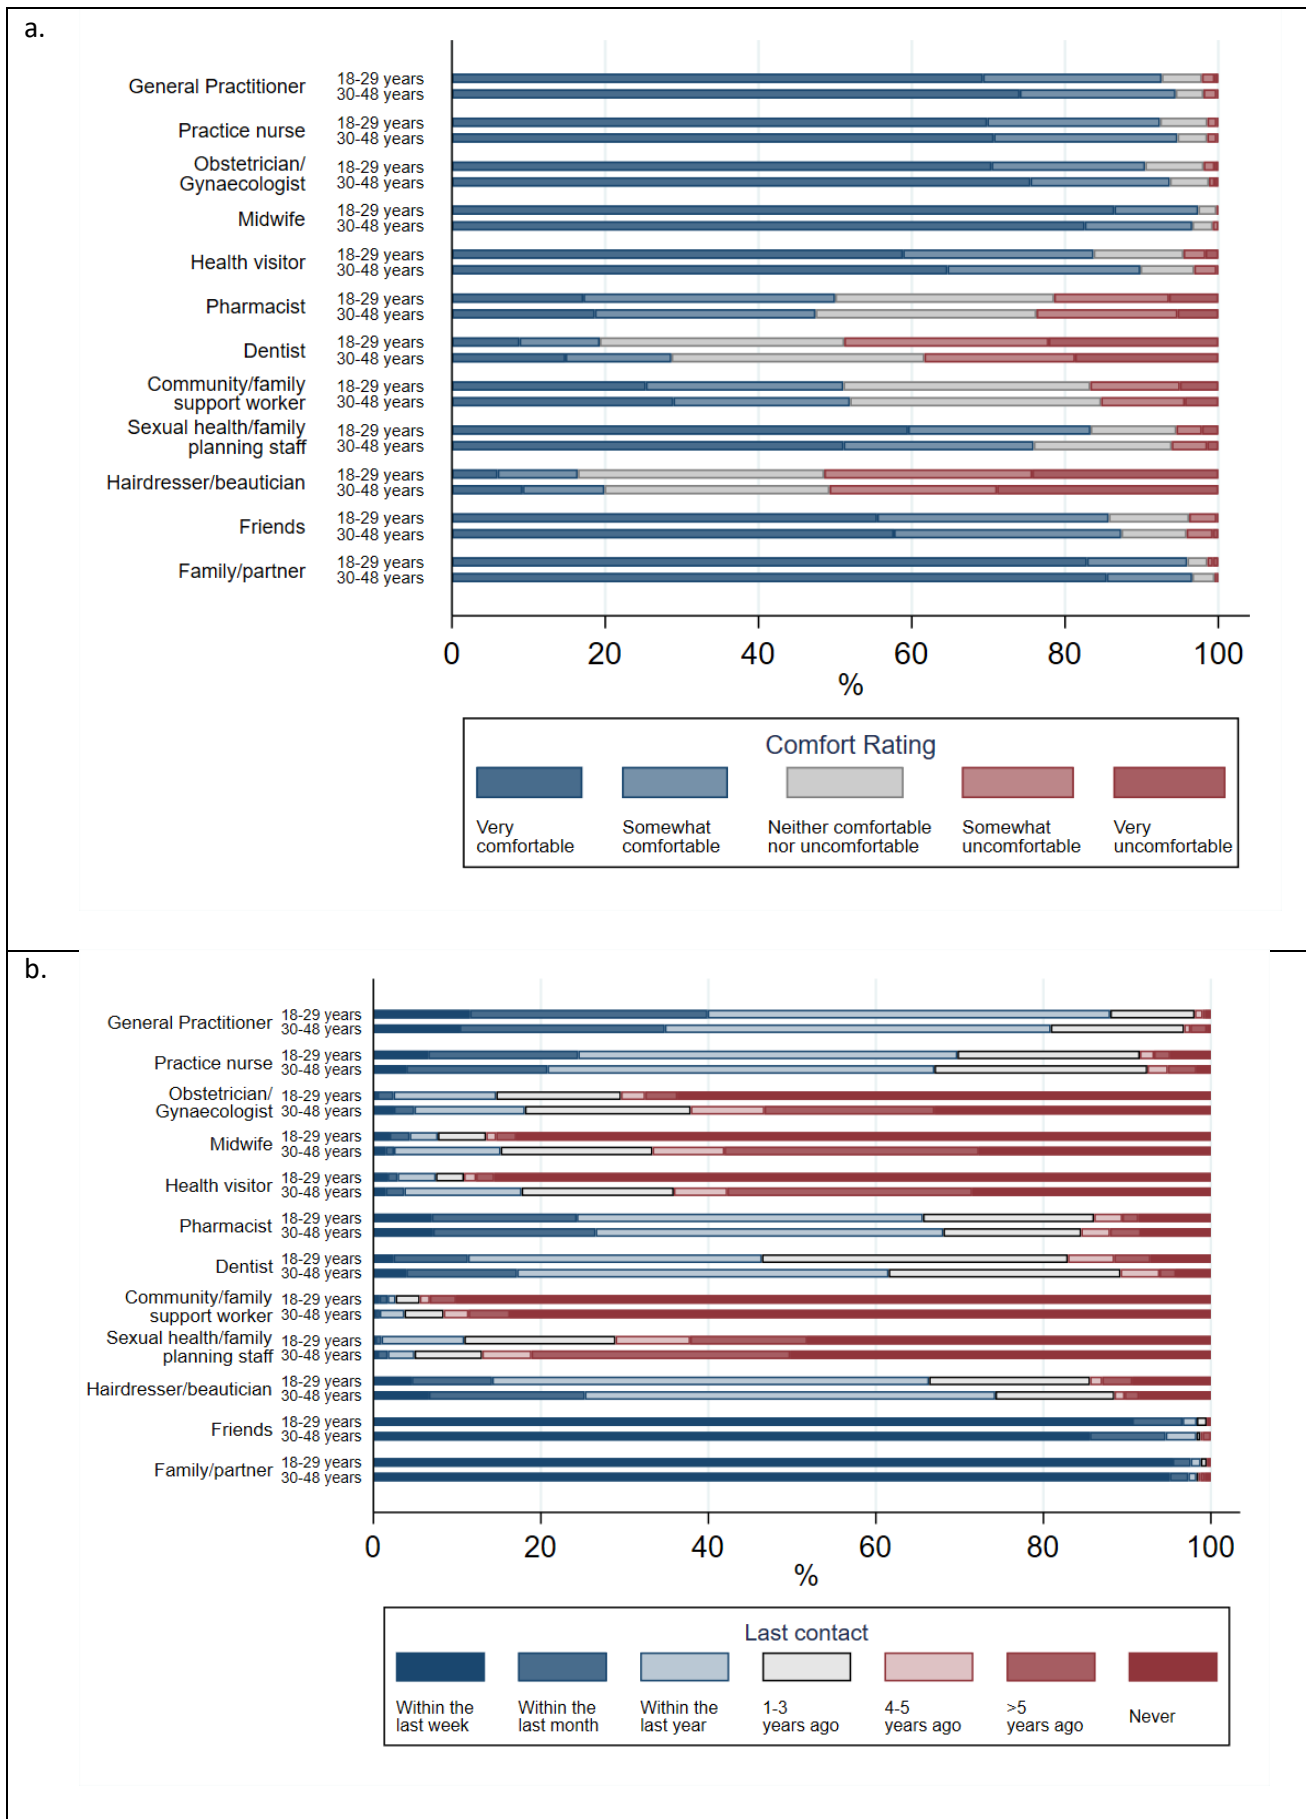

## Discussion

Preconception health is an increasing priority for policy makers, public health and clinicians. This is the first UK study since 1998 to investigate women's knowledge of and attitudes towards preconception health, and the first to explore the acceptability of both healthcare- and community-based intervention delivery methods. Preconception health knowledge was generally low. Most women were unaware that lack of folic acid supplementation, BMI, interpregnancy weight change, abuse, advanced age, excess iron intake and interpregnancy intervals are maternal preconception risk factors. We identified that younger women and nulligravid women were less aware of the benefit of preconception folic acid supplementation, and women with lower household incomes were less aware of the importance of preconception BMI. Women's attitudes towards preconception health were generally positive, though almost half reported low interest in preconception health education. Younger women were more interested in this, whereas nulligravid women were less interested. Women with lower household incomes rated the importance of preconception health lower. Most women reported recent contact with GPs, practice nurses, pharmacists, and family/partners, and considered these acceptable intervention delivery channels. Websites/apps, printed healthcare materials, schools, pregnancy tests, television and social media were also considered acceptable settings for preconception health information provision.

### Limitations

Our study has some limitations relating to its sample, response rate, and administration. As responses were self-reported, some women may have consulted online material to inform their questionnaire responses. This may have resulted in an overestimation of knowledge, as women may have listed preconception risk factors they would not have otherwise been aware of. Administration by a researcher may have led to underreporting, however, due to the sensitive nature of some of the questions. Regarding the study's sample, the overrepresentation of university graduates and White, UK-born and high-income women limits the generalisability of the study's findings to the UK population. The low number of responses from minority ethnic women and women born outside the UK also limited our ability to detect precise outcome estimates for these groups. Moreover, if preconception health was of greater relevance to the minority of women who took part than those who did not, this may have introduced a self-selection bias, where knowledge was greater and attitudes more favourable. This is less likely to have affected the reported associations, however (43).

A further potential limitation is our choice of preconception risk factors. While we felt it was prudent to select risk factors based on the certainty of the evidence for their preconception associations with adverse pregnancy, birth and postpartum outcomes, there are arguably other valid reasons for practicing or avoiding other exposures preconceptionally. These include the avoidance of antenatal exposure arising from late pregnancy recognition, or the difficulty involved in making immediate changes to established habits in pregnancy (15). From this perspective, exposures such as smoking and alcohol consumption, listed by most participants, could be considered appropriate responses. So too could responses such as mental health/self-care and social support and relationships, as these may be important determinants and facilitators of positive preconception behaviours. We have therefore included the full list of participant-suggested risk factors in Additional file 4.

### Interpretation

The findings of this study do not replicate those from the last assessment of preconception knowledge and attitudes in the United Kingdom, collected 25 years ago (20). In that study, reproductive-aged women in the England were "generally well informed" about preconception health. We found low knowledge of preconception risk factors in the present study, particularly of preconception-specific factors like folic acid supplementation and interpregnancy intervals. They found 40% of women considered preconception care to be 'essential'. In our study we found 92.7% of our participants perceived preconception health to be important. Birth outside the UK, minority ethnicity, lack of higher education and nulligravidity were the strongest correlates of low preconception health knowledge in Wallace and Hurwitz (20), but we found only lack of higher education and nulligravidity were associated with this lack of knowledge, along with younger

age and lower household incomes. These differences may be due to the lack of multivariate statistical methods in Wallace and Hurwitz (20), or our study having fewer women from ethnic minority groups but recruiting more general practices from socioeconomically deprived areas.

Our findings also contrast with those of Stern et al. (19), the only other study to have assessed preconception health knowledge without naming risk factors in their questionnaire. A minority of participants in the present study listed folic acid, though fewer respondents in Stern et al. listed this risk factor (33% vs 4%). This may reflect actual differences in knowledge between Swedish and English women, or be attributable to Stern et al.'s sampling of university students only, as younger age was associated with a lack of knowledge of this risk factor in both studies. Both studies also found lower educational attainment and lack of pregnancy desire to correlate with low knowledge of preconception health. Unlike the present study, however, gravidity was not associated with knowledge in Stern et al., though this may be due to the low number of gravid women (17) in their control groups. Moreover, fewer women in the present study reported that they were unlikely to make preconception lifestyle changes than in Stern et al. (6.8% vs 14%). This may reflect either national attitudinal differences or differential lifestyle behaviours amongst students.

### Future research

Future research should seek to identify explanations for why some women are less interested and less aware of preconception health, perceive it to be less important, and are less likely and less confident in their ability to make preconception health changes. Research has implicated factors like cost and time availability as barriers to other health behaviours, like healthy eating and physical activity (44), but it is yet unclear whether these apply to preconception health specifically. Moreover, evidence from systematic reviews suggests interventions targeting women's knowledge of and attitudes towards preconception health can be effective in improving knowledge and health behaviours (13, 15), and there is some evidence from services and interventions that effecting positive changes in these factors can relate to improved maternal health and pregnancy outcomes (45-47). We identify here acceptable delivery methods for interventions targeting these factors; Future research should explore conditions that might further affect the acceptability of these methods, as this may increase the likelihood of intervention effectiveness (48) and stakeholder buy-in (49). Future research should also explore the acceptability of low-agency population interventions, such as food fortification and activity-promoting environments, that may work in tandem with interventions seeking to provide advice, guidance, and encouragement around preconception health (50).

### Conclusions

Our findings highlight the need for public health interventions promoting the importance of preconception health and knowledge of lesser known preconception risk factors such as folic acid supplementation, maternal BMI, and interpregnancy intervals, particularly amongst younger and nulliparous women, and women with lower incomes. Younger women were more interested in learning more about preconception health and may therefore be more receptive to these interventions. Healthcare providers and settings were widely viewed as acceptable intervention delivery methods, but we also found that methods in community settings, such as family/partners, social media, websites and apps, health education in schools and pregnancy tests, were acceptable. There is arguably a need for greater consideration to these methods, given that many women – younger women in particular - reported never having contact with most healthcare provider groups. Moreover, healthcare-based methods are less likely to reach individuals at risk of an unplanned pregnancy, or whose pregnancy intentions are not known to their healthcare provider (18), and women are more likely to receive information on preconception health from non-healthcare sources (14). This suggests that methods such as population-wide information campaigns using social media and health education in schools may have greater reach in accessing younger and nulliparous women.



## List of abbreviations

**AHEI:** Alternate Healthy Eating Index

**BMI:** Body Mass Index

**GP:** General Practitioner

**Natsal-3:** National survey of sexual attitudes and lifestyles

## Additional material

- Additional file 1 (.docx): 'Questions stems, response options, sources, psychometric properties, and modifications made to the survey's questionnaire items'
- Additional file 2 (.docx): 'Intervention delivery methods featured in the study questionnaire, with sources'
- Additional file 3 (.docx): 'Covariates included in each adjusted analysis'
- Additional file 4 (.docx): '“Extraneous” exposures\* reported by participants (%), with accepted responses'
- Additional file 5 (.docx): 'Proportion of participants who listed each preconception risk factor, by participant characteristic'
- Additional file 6 (.docx): 'Women's attitudes towards preconception health'

## Declarations

### i. Ethics approval and consent to participate

The study received ethical approval from the South West – Frenchay Research Ethics Committee (committee reference number 19/SW/0235) prior to its conduct. The first page of the questionnaire informed participants that to take part in the study, they were required to read and tick each of four statements indicating that they: (i) had read the relevant version of the Participant Information Sheet and had the opportunity to ask questions and have these answered fully; (ii) understood that their participation was voluntary; (iii) understood that the data they provided could be stored and used in its anonymised form for reports, publications, and/or teaching materials from the research and by other researchers for other research; (iv) agreed to take part in the study. Contact details for the study team were included in the study invitation letter to give patients the opportunity to ask questions before participating. Personally identifiable data will not be shared outside the study team.

### ii. Consent for publication

Not applicable.

### iii. Competing interests

The authors declare that they have no competing interests

### iv. Funding

This work was supported in part by grant MR/N0137941/1 for the GW4 BIOMED DTP, awarded to the Universities of Bath, Bristol, Cardiff and Exeter from the Medical Research Council (MRC)/UKRI. The funding body had no role in the design of the study and collection, analysis, and interpretation of data and in writing the manuscript

### v. Authors' contributions

RK conceived the idea of the study and all authors were involved in its design. MD was responsible for: preparing the study's ethical review application; recruiting and liaising with participating GP practices; entering and preparing the study data; performing the statistical analyses; and writing the final report, with guidance and input from RK, JW and JS. All authors read, edited and approved the final manuscript.

### vi. Acknowledgements

The authors thank the women who took part in this study, the staff of the general practices who acted as the study's participant identification centres, and NIHR CRN West of England who helped us to recruit these practices and funded the study's service support costs. We also wish to thank: Rona Campbell, Deborah Lawlor, Gemma Morgan and Rhiannon Macefield, who provided guidance on the study's design; Mike Bell at NIHR ARC West, who facilitated the study's public involvement; and Judith Stephenson, Chandni Maria Jacob, Deirdre de Barra and Jo Williams, who reviewed the study's protocol and materials prior to its conduct.

## References

1. Quenby S, Gallos ID, Dhillon-Smith RK, Podesek M, Stephenson MD, Fisher J, et al. Miscarriage matters: the epidemiological, physical, psychological, and economic costs of early pregnancy loss. *The Lancet*. 2021;397(10285):1658-67.
2. Chawanpaiboon S, Vogel JP, Moller A-B, Lumbiganon P, Petzold M, Hogan D, et al. Global, regional, and national estimates of levels of preterm birth in 2014: a systematic review and modelling analysis. *The Lancet Global Health*. 2019;7(1):e37-e46.
3. United Nations Children's Fund (UNICEF). Neonatal mortality. 2020. <https://data.unicef.org/topic/child-survival/neonatal-mortality/>. Accessed 20 May 2022.
4. World Health Organization. Trends in maternal mortality 2000 to 2017: estimates by WHO, UNICEF, UNFPA, World Bank Group and the United Nations Population Division. 2019. <https://data.unicef.org/topic/maternal-health/maternal-mortality/>. Accessed 20 May 2022.
5. Daly M, Kipping RR, Tinner LE, Sanders J, White JW. Preconception exposures and adverse pregnancy, birth and postpartum outcomes: Umbrella review of systematic reviews. *Paediatric and Perinatal Epidemiology*. 2021;36(2):288-99.
6. National Health Service. Planning your pregnancy. 2020. <https://www.nhs.uk/conditions/pregnancy-and-baby/planning-pregnancy/>. Accessed 20 May 2022.
7. National Institute for Health and Care Excellence (NICE). Pre-conception - advice and management. 2019. <https://cks.nice.org.uk/pre-conception-advice-and-management>. Accessed 20 May 2022.
8. Public Health England. Making the Case for Preconception Care. 2018. [https://assets.publishing.service.gov.uk/government/uploads/system/uploads/attachment\\_data/file/729018/Making\\_the\\_case\\_for\\_preconception\\_care.pdf](https://assets.publishing.service.gov.uk/government/uploads/system/uploads/attachment_data/file/729018/Making_the_case_for_preconception_care.pdf). Accessed 20 May 2022.
9. Toivonen KI, Lacroix E, Flynn M, Ronksley PE, Oinonen KA, Metcalfe A, et al. Folic acid supplementation during the preconception period: A systematic review and meta-analysis. *Preventive Medicine*. 2018;114:1-17.
10. Public Health England. Health of women before and during pregnancy: health behaviours, risk factors and inequalities. An updated analysis of the maternity services dataset antenatal booking data. 2019. [https://assets.publishing.service.gov.uk/government/uploads/system/uploads/attachment\\_data/file/844210/Health\\_of\\_women\\_before\\_and\\_during\\_pregnancy\\_2019.pdf](https://assets.publishing.service.gov.uk/government/uploads/system/uploads/attachment_data/file/844210/Health_of_women_before_and_during_pregnancy_2019.pdf). Accessed 26 May 2022.
11. Flegal KM, Carroll MD, Kit BK, Ogden CL. Prevalence of obesity and trends in the distribution of body mass index among US adults, 1999-2010. *JAMA*. 2012;307(5):491-7.
12. Guthold R, Stevens GA, Riley LM, Bull FC. Worldwide trends in insufficient physical activity from 2001 to 2016: a pooled analysis of 358 population-based surveys with 1.9 million participants. *The Lancet Global Health*. 2018;6(10):e1077-e86.
13. Delissaint D, McKyer ELJ. A systematic review of factors utilized in preconception health behavior research. *Health Education & Behavior*. 2011;38(6):603-16.
14. Stephenson J, Patel D, Barrett G, Howden B, Copas A, Ojukwu O, et al. How do women prepare for pregnancy? Preconception experiences of women attending antenatal services and views of health professionals. *Plos One*. 2014;9(7):e103085.
15. Toivonen KI, Oinonen KA, Duchene KM. Preconception health behaviours: A scoping review. *Preventive Medicine*. 2017;96:1-15.
16. Stephenson J, Hesehurst N, Hall J, J M Schoenaker DA, Hutchinson J, Cade JE, et al. Before the beginning: nutrition and lifestyle in the preconception period and its importance for future health. *The Lancet*. 2018;391:1830-41.
17. Johnson K, Posner SF, Biermann J, Cordero JF, Atrash HK, Parker CS, et al. Recommendations to Improve Preconception Health and Health Care — United States: Report of the CDC/ATSDR Preconception Care Work Group and the Select Panel on Preconception Care. *Morbidity and Mortality Weekly Report: Recommendations and Reports*. 2006;55(1):23.
18. Cairncross ZF, Ravindran S, Yoganathan S, Dennis C-L, Enders J, Graves L, et al. Measurement of Preconception Health Knowledge: A Systematic Review. *American Journal of Health Promotion*. 2019;33(6):941-54.

19. Stern J, Larsson M, Kristiansson P, Tyden T. Introducing reproductive life plan-based information in contraceptive counselling: an RCT. *Hum Reprod*. 2013;28(9):2450-61.
20. Wallace M, Hurwitz B. Preconception care: who needs it, who wants it, and how should it be provided? *British Journal of General Practice*. 1998;48(427):963-6.
21. Von Elm E, Altman DG, Egger M, Pocock SJ, Gøtzsche PC, Vandenbroucke JP. The Strengthening the Reporting of Observational Studies in Epidemiology (STROBE) statement: guidelines for reporting observational studies. *Bulletin of the World Health Organization*. 2007;85:867-72.
22. Michie SF, West R, Campbell R, Brown J, Gainforth H. *ABC of behaviour change theories*. Silverback Publishing; 2014.
23. Ministry of Housing, Communities & Local Government. The English indices of deprivation 2019. 2019. <https://www.gov.uk/government/statistics/english-indices-of-deprivation-2019>. Accessed 26 May 2022.
24. Krumpal I. Determinants of social desirability bias in sensitive surveys: a literature review. *Quality & Quantity*. 2013;47(4):2025-47.
25. Government Statistical Service. Harmonised principles by topic. <https://gss.civilservice.gov.uk/guidances/harmonised-standards-guidance/>. Accessed 26 May 2022.
26. World Health Organisation. MONICA Manual, Part III: Population Survey. Section 1: Population Survey Data Component. 1997. <https://www.thl.fi/publications/monica/manual/part3/iii-1.htm>. Accessed 26 May 2022.
27. Office for National Statistics. Gross household income, UK, financial year ending 2018. 2019. <https://www.ons.gov.uk/peoplepopulationandcommunity/personalandhouseholdfinances/incomeandwealth/adhocs/009772grosshouseholdincomeukfinancialyearending2018>. Accessed 26 May 2022.
28. Erens B, Phelps A, Clifton S, Mercer CH, Tanton C, Hussey D, et al. Methodology of the third British national survey of sexual attitudes and lifestyles (Natsal-3). *Sex Transm Infect*. 2014;90(2):84-9.
29. Delgado C. Pregnancy 101: a call for reproductive and prenatal health education in college. *Maternal and Child Health Journal*. 2013;17(2):240-7.
30. Best Start Resource Center. Preconception Health: Awareness and Behaviours in Ontario. 2009. <https://resources.beststart.org/wp-content/uploads/2018/12/F11-E.pdf>. Accessed 26 April 2022.
31. Frey KA, Files JA. Preconception healthcare: what women know and believe. *Maternal and Child Health Journal*. 2006;10(1):73-7.
32. Weisman CS, Hillemeier MM, Chase GA, Misra DP, Chuang CH, Parrott R, et al. Women's perceived control of their birth outcomes in the Central Pennsylvania Women's Health Study: implications for the use of preconception care. *Women Health Iss*. 2008;18(1):17-25.
33. de Vet HCW, Terwee CB, Mokkink LB, Knol DL. *Measurement in medicine: a practical guide*. Cambridge University Press; 2011.
34. Macfarlane SBJ. Conducting a descriptive survey: 2. Choosing a sampling strategy. *Tropical Doctor*. 1997;27(1):14-21.
35. Office for National Statistics. Age of women giving birth. 2021. <https://www.ons.gov.uk/aboutus/transparencyandgovernance/freedomofinformationfoi/ageofwome ngivin gbirth>. Accessed 26 April 2022.
36. Schisterman EF, Cole SR, Platt RW. Overadjustment bias and unnecessary adjustment in epidemiologic studies. *Epidemiology*. 2009;20(4):488.
37. Office for National Statistics. Number of individuals by gross income band in the UK for the financial year ending 2020. 2021. <https://www.ons.gov.uk/peoplepopulationandcommunity/personalandhouseholdfinances/incomeandwealth/adhocs/13866numberofindividualsbygrossincomebandintheukforthefinancialyearending2020>. Accessed 26 April 2022.
38. Office for National Statistics. Estimates of the population for the UK, England and Wales, Scotland and Northern Ireland. 2021. <https://www.ons.gov.uk/peoplepopulationandcommunity/populationandmigration/populationestimates/datasets/populationestimatesforukenglandandwalesscotlandandnorthernireland>. Accessed 26 April 2022.

39. Office for National Statistics. Population estimates by ethnic group and religion, England and Wales: 2019. 2021. <https://www.ons.gov.uk/peoplepopulationandcommunity/populationandmigration/populationestimates/articles/populationestimatesbyethnicgroupandreligionenglandandwales/2019>. Accessed 26 April 2022.
40. Office for National Statistics. Graduates in the UK labour market: 2017. 2017. <https://www.ons.gov.uk/employmentandlabourmarket/peopleinwork/employmentandemployeetypes/articles/graduatesintheuklabourmarket/2017>. Accessed 26 April 2022.
41. Office for National Statistics. Population of the UK by country of birth and nationality: 2019. 2020. <https://www.ons.gov.uk/peoplepopulationandcommunity/populationandmigration/internationalmigration/bulletins/ukpopulationbycountryofbirthandnationality/2019>. Accessed 26 April 2022.
42. Datta J, Palmer MJ, Tanton C, Gibson LJ, Jones KG, Macdowall W, et al. Prevalence of infertility and help seeking among 15 000 women and men. *Hum Reprod*. 2016;31(9):2108-18.
43. Blair E, Zinkhan GM. From the editor: nonresponse and generalizability in academic research. *Journal of the Academy of marketing Science*. 2006;34(1):4-7.
44. Roberts K, Marvin K. Knowledge and attitudes towards healthy eating and physical activity: what the data tell us. 2011. <https://www.yumpu.com/en/document/read/36679275/knowledge-and-attitudes-towards-healthy-eating-and-physical-activity>. Accessed 26 April 2022.
45. Williams L, Zapata LB, D'Angelo DV, Harrison L, Morrow B. Associations between preconception counseling and maternal behaviors before and during pregnancy. *Maternal and Child Health Journal*. 2012;16(9):1854-61.
46. Schwarz EB, Sobota M, Gonzales R, Gerbert B. Computerized Counseling for Folate Knowledge and Use A Randomized Controlled Trial. *American Journal of Preventive Medicine*. 2008;35(6):568-71.
47. Elsinga J, de Jong-Potjer LC, van der Pal-de Bruin KM, le Cessie S, Assendelft WJJ, Buitendijk SE. The Effect of Preconception Counselling on Lifestyle and Other Behaviour before and during Pregnancy. *Women Health Iss*. 2008;18(6):S117-S25.
48. Sekhon M, Cartwright M, Francis JJ. Acceptability of healthcare interventions: an overview of reviews and development of a theoretical framework. *BMC Health Services Research*. 2017;17(1):1-13.
49. Diepeveen S, Ling T, Suhrcke M, Roland M, Marteau TM. Public acceptability of government intervention to change health-related behaviours: a systematic review and narrative synthesis. *BMC Public Health*. 2013;13(1):1-11.
50. Adams J, Mytton O, White M, Monsivais P. Why are some population interventions for diet and obesity more equitable and effective than others? The role of individual agency. *PLoS Medicine*. 2016;13(4):e1001990.
